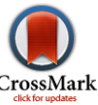

# Stochastic Optimal Foraging: Tuning Intensive and Extensive Dynamics in Random Searches

Frederic Bartumeus<sup>1,2\*</sup>, Ernesto P. Raposo<sup>3</sup>, Gandhimohan M. Viswanathan<sup>4</sup>, Marcos G. E. da Luz<sup>5</sup>

**1** ICREA Movement Ecology Laboratory, CEAB-CSIC, Blanes, Spain, **2** CREAM, Cerdanyola del Vallès, Barcelona, Spain, **3** Laboratório de Física Teórica e Computacional, Departamento de Física, Universidade Federal de Pernambuco, Recife-PE, Brazil, **4** Departamento de Física Teórica e Experimental, Universidade Federal do Rio Grande do Norte, Natal-RN, Brazil, **5** Departamento de Física, Universidade Federal do Paraná, Curitiba-PR, Brazil

## Abstract

Recent theoretical developments had laid down the proper mathematical means to understand how the structural complexity of search patterns may improve foraging efficiency. Under information-deprived scenarios and specific landscape configurations, Lévy walks and flights are known to lead to high search efficiencies. Based on a one-dimensional comparative analysis we show a mechanism by which, at random, a searcher can optimize the encounter with close and distant targets. The mechanism consists of combining an optimal diffusivity (optimally enhanced diffusion) with a minimal diffusion constant. In such a way the search dynamics adequately balances the tension between finding close and distant targets, while, at the same time, shifts the optimal balance towards relatively larger close-to-distant target encounter ratios. We find that introducing a multiscale set of reorientations ensures both a thorough local space exploration without oversampling and a fast spreading dynamics at the large scale. Lévy reorientation patterns account for these properties but other reorientation strategies providing similar statistical signatures can mimic or achieve comparable efficiencies. Hence, the present work unveils general mechanisms underlying efficient random search, beyond the Lévy model. Our results suggest that animals could tune key statistical movement properties (e.g. enhanced diffusivity, minimal diffusion constant) to cope with the very general problem of balancing out intensive and extensive random searching. We believe that theoretical developments to mechanistically understand stochastic search strategies, such as the one here proposed, are crucial to develop an empirically verifiable and comprehensive animal foraging theory.

**Citation:** Bartumeus F, Raposo EP, Viswanathan GM, da Luz MGE (2014) Stochastic Optimal Foraging: Tuning Intensive and Extensive Dynamics in Random Searches. PLoS ONE 9(9): e106373. doi:10.1371/journal.pone.0106373

**Editor:** Mark D. McDonnell, University of South Australia, Australia

**Received:** May 2, 2014; **Accepted:** August 6, 2014; **Published:** September 12, 2014

**Copyright:** © 2014 Bartumeus et al. This is an open-access article distributed under the terms of the Creative Commons Attribution License, which permits unrestricted use, distribution, and reproduction in any medium, provided the original author and source are credited.

**Data Availability:** The authors confirm that all data underlying the findings are fully available without restriction. All relevant data are within the paper.

**Funding:** The authors thank for financial support the Spanish Government and Ministry of Science (BFU-2010-22337), the Human Frontier Science Program (RGY0084-2011), and CNPq, CAPES, and FACEPE (Brazilian agencies). The funders had no role in study design, data collection and analysis, decision to publish, or preparation of the manuscript.

**Competing Interests:** The authors have declared that no competing interests exist.

\* Email: fbartu@ceab.csic.es

## Introduction

Optimal foraging is one of the most extensively studied optimization process in ecology and evolutionary biology [1–5]. To fully develop a comprehensive theory of animal foraging, one must understand separately the evolutionary trade-offs and the contribution of the different elements involved in the foraging dynamics [3,6], including pre-detection components such as search and taxis, and post-detection events such as pursuing and handling a prey or exploiting a patch [3,6]. Landscape behavioral ecology [7–9], for example, highlights the relevance of the search component by observing that animal perceptual scales are often much smaller than the exploration scales. It also shows that the degradation of sensory or memory-based information leads to stochastic motor outputs and decision making [8,10].

Despite the vast amount of literature quantifying movement in the context of foraging, only recently the focus has shifted to the *spatial search optimization problem*, aimed at explaining movement patterns under low information load. [11–13]. Here we develop in great depth a spatially explicit Stochastic Optimal Foraging Theory (SOFT, see [14,15]) to explore the underlying mechanisms responsible for random encounter success. Importantly, the

assumption of a foraging animal as a random wanderer passes over a more comprehensive picture of animal search ecology, where distinct quantity and quality of information (present or past) is processed [16–18]. Simple stochastic models, however, are useful to tackle complex spatial search problems [19]. In this sense, random walk methods in general and SOFT [15] in particular should play a complementary role to biologically-detailed modeling and shed light on universal features of search strategies [13].

In its core formulation SOFT quantifies the distance traveled (or time spent) by a random walker that starts moving from a given initial position within a spatial region delimited by absorbing boundaries, which represent the targets to be found. Each time the walker reaches the boundaries, an encounter is computed and the search process starts all over again. Averages on the properties of many walk realizations are aimed to reproduce the dynamics of a forager looking for successive targets under specific environmental conditions [14].

SOFT differs from classical optimal foraging theory in two fundamental aspects. First, it is a spatially explicit theory focused on the exploration component of the classical patch exploration/exploitation trade-off [1,2,4]. Second, it considers inter-patch travel as a *random search* [11–13,20] rather than a *traveling*

salesman [21] optimization process. In particular, doubt is cast on whether inter-patch motion should always be ballistic, or else, complex search patterns occur between patches. In consonance with previous works, e.g. [22–25], current search theory has identified reorientations (turns) as key behavioral events for random search optimization [11–13].

Using the SOFT framework, we quantify the impact of animals' reorientation strategies and spreading capacity on the search efficiency. Specifically, we unveil the main aspects associated with the tension between optimizing the encounters for nearby targets while balancing the ability to search for further areas. Assuming distinct movement strategies (represented by probability density functions, i.e. pdfs, for the move lengths) we study which common statistical characteristics of such pdfs can lead to higher encounter rates. Those pdfs yielding reorientation patterns with a proper compromise between local and far away searching (like Lévy walks) are the ones optimizing (or at least improving) search efficiency. In practice, in Lévy walk models the turning angles are drawn from a uniform probability distribution and the lengths of the moves are chosen from a power-law probability distribution [13,26].

Finally, one technical point deserves some considerations. The one-dimensional (1D) context approached in this work may not seem the most general case and certain particular characteristics of random walks might depend on the spatial dimension. Nevertheless, it is mathematically convenient and already contains the essentials of any random search in  $n$  D [20,27] (as for the optimization condition and behavior at low density of targets). In the simple but very general dynamics assumed here, the searcher chooses a random direction and draws a step length  $\ell$  from a given pdf  $p(\ell)$ . It then moves in a straight line, looking for a target along the way. If the forager does not find any target after traveling  $\ell$ , it changes direction and pick a new distance to go. This process is repeated many times during a full search. Hence, the statistics of the  $\ell$ 's, which depict rectilinear locomotion, represents one of the main aspects of the problem (e.g., related to the search efficiency). This ubiquitous 1D process embedded into an arbitrary  $n$  D search makes the simpler 1D search to be qualitatively representative of the more complex  $n$  D situation [14]. Therefore, the 1D formulation has the twofold advantage of providing very general results (the underlying mechanisms and trade-offs of efficient searches remain valid in more complex environmental scenarios) and at the same time being simple enough for a full analytical description.

### Analysis

We focus here on a point-like searcher, with a radius of vision (or perceptual range)  $r_v$ , that looks for equally spaced point-like targets separated by a distance  $\lambda$  in a 1D search space (see Fig. 1a). The searcher starts at an arbitrary point  $x_0$ . It then scans the space between the two nearest (boundary) targets by choosing a direction (left or right) with equal probability and taking move lengths  $\ell$  from a pdf  $p(\ell)$  (Fig. 1b). Such normalized pdf, namely,

$$\int_{-\infty}^{+\infty} p(\ell) d\ell = 1, \tag{1}$$

is taken to be symmetric [ $p(-\ell) = p(\ell)$ ] and kept unaltered during the whole search process.

An encounter takes place each time the searcher is at a detection distance  $r_v$  from a target. The search then restarts with the walker now placed at distance  $x_0$  either to the left or to the right (with 50%–50% probability) of the last target found (Fig. 1c). This

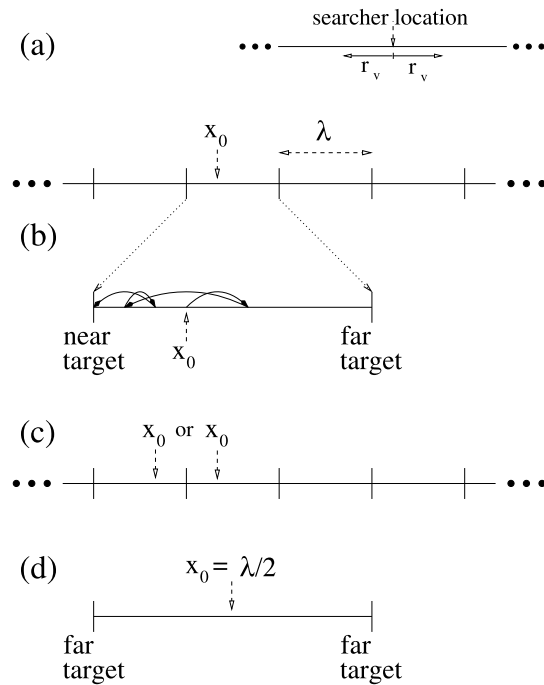

**Figure 1. Diagrams showing the symmetric and asymmetric initial search conditions for the 1D stochastic search model.** (a) The 1D searching environment with equally spaced point-like targets. The initial searcher location is  $x_0$ . A detail of the searcher perceptual range (or radius of vision  $r_v$ ) is shown. (b) An example of the walk movement dynamics where a target is found after four steps. (c) In the asymmetric condition, each time the searcher finds a target, the search is re-initialized by placing it a distance  $x_0$  to the right or to the left of the target found. (d) In the symmetric starting condition,  $x_0 = \lambda/2$ . doi:10.1371/journal.pone.0106373.g001

dynamics is repeated a large number of times,  $N_{\text{found}}$ , and averages are performed so as to lead to a proper statistical characterization of the full movement pattern. Note that the total traveled distance ( $L_{\text{tot}}$ ) is composed by the concatenation of all the partial search trajectories performed by the searcher along consecutive encounters. The above mentioned averages will describe a typical random search process in an environment with global density of targets  $\rho \propto 1/(\text{mean distance between targets}) = 1/\lambda$ .

The present framework allows an important technical simplification. Due to the above features the search for the first target is statistically equivalent to the search for any subsequent target. In this way, we obtain exactly the same results by restricting our study to the situation where the searcher is always within the region  $0 \leq x \leq \lambda$ , with the targets (acting as absorbing boundaries, meaning that once a target is found that particular search dynamics ends and the process of looking for a target starts all over again) at  $x = 0$  and  $x = \lambda$ . Thus, we consider the walker movement until reaching a boundary (just as above) and repeat the procedure a number  $N_{\text{found}}$  of times. We should also observe that in terms of the general random walk theory, one event, namely, the finding of a single target either at  $x = 0$  or  $x = \lambda$ , corresponds to the so called first-passage-time problem [28].

In this work we focus mainly on two limiting initial conditions (see, e.g., Refs. [15,17,20]), even though the analysis for initial conditions intermediate between these two cases is also provided (see also [14]). Suppose first that the starting point is at the middle of the interval,  $x_0 = a = \lambda/2$  (Fig. 1d). In the regime of low density

of targets (large  $\lambda$ ), this means that once a target is found, the searcher restarts its search faraway from the subsequent targets to be found. This symmetric condition corresponds to the foraging case where, once a food item is located and consumed, there are no other resources nearby, and thus the forager needs to travel relatively away from its present location in order to find targets. In contrast, the asymmetric condition  $x_0 = a$ , where  $a$  is either close to 0 or  $\lambda$ , represents the situation where, once a target is located, another one is always available nearby, so that the next search starts with both a close and a distant target.

Symmetric conditions are well represented by destructive (e.g. hunting) search processes in homogeneous resource landscapes [20], whereas asymmetric conditions can represent both non-destructive (e.g. pollinating) searches, regardless the landscape properties, and destructive (e.g. hunting) searches when targets are patchily distributed [20,27]). These two initial limiting conditions illustrate the fundamental competition between looking efficiently for nearby targets and exploring new regions to find distant targets [14,15,27]. It is also possible to take  $x_0$  as a random variable distributed according to some given pdf and use the present framework to explore search processes in heterogeneous landscapes characterized by a distribution of initial conditions (see [14,15,17] for an explicit analysis of the role of  $x_0$  to the search efficiency).

Some other features should also be considered. First, we set  $p(\ell) = 0$  for  $|\ell| < \ell_0$ , so that there is a minimum move length  $\ell_0$ . As an example,  $\ell_0$  could be taken as the maximum resolution of an empirical data set. Actually, here  $\ell_0$  can assume any arbitrarily small positive value. Moreover, although in principle the parameter  $\ell_0$  does not need to be related to  $r_v$ , we set for simplicity  $r_v = \ell_0$  in our calculations. Since our interest is in the low density limit, where movement patterns may be an essential factor for survival, we also take  $\lambda \gg r_v$  and  $\lambda \gg \ell_0$ . The stochastic character of the search is favored in this low-density regime.

We define a statistical search efficiency  $\eta$  as

$$\eta = \frac{N_{\text{found}}}{L_{\text{tot}}} \tag{2}$$

By denoting  $\langle L \rangle$  as the average distance traveled between two successive targets found, we write

$$L_{\text{tot}} = N_{\text{found}} \langle L \rangle, \tag{3}$$

which leads to

$$\eta = \frac{1}{\langle L \rangle}. \tag{4}$$

Likewise, the total number of moves in the search walk can be written as

$$N = N_{\text{found}} \langle n \rangle, \tag{5}$$

with  $\langle n \rangle$  being the average number of moves between two successive targets.

Of great importance in our analysis is the quantification of the relative contributions to the search efficiency of the encounters of nearby and distant targets. We thus provide a factorization of the average distance between two successive targets in the form

$$\langle L \rangle = p_0 \langle L_0 \rangle + p_\lambda \langle L_\lambda \rangle, \tag{6}$$

where we assign  $p_0$  ( $p_\lambda$ ) to the probability of the searcher to find the nearest (farthest) target, with  $p_0 + p_\lambda = 1$ , and  $\langle L_0 \rangle$  ( $\langle L_\lambda \rangle$ ) denotes the corresponding average traveled distance. By further defining  $\langle |\ell| \rangle(x_0)$  as the average length of a single step starting at position  $x_0$ , we have that  $\langle |\ell| \rangle$ ,  $\langle L \rangle$ ,  $p_0$ ,  $p_\lambda$ ,  $\langle L_0 \rangle$  and  $\langle L_\lambda \rangle$  are key functions to fully describe the random search process. Note that all of them depend on the walker initial position  $x_0$ . For instance, for the symmetric case ( $x_0 = \lambda/2$ ) it follows that  $\langle L_0 \rangle = \langle L_\lambda \rangle$  and  $p_0 = p_\lambda = 1/2$ . In contrast, in the asymmetric case  $\langle L_0 \rangle < \langle L_\lambda \rangle$  and  $p_0 > p_\lambda$ . The necessary mathematical machinery to calculate the above quantities has been developed in [29,30] for the specific case of Lévy walks. To make the present contribution self-contained, we review in a very comprehensive manner all the steps necessary to obtain such quantities for any  $p(\ell)$  (Appendix S1 in File S1), and particularize our general results for the biologically relevant cases of stretched exponential, log-normal, and gamma pdfs (Appendix S2 in File S1).

The above construction describes the essential dynamics of a non-informed stochastic foraging process, where search efficiency results only from proper choices for  $p(\ell)$ . In the following we review previously considered quantities [15] and propose new ones, all of them  $p(\ell)$ -dependent and aimed to characterize the full random search dynamics. These quantities constitute good figures of merit for an optimal theory.

### The root-mean-square displacement

The searcher's root-mean-square (r.m.s.) displacement is defined in terms of averages over the position  $x$  of the searcher according to

$$R \equiv [\langle (\Delta x)^2 \rangle]^{1/2} = [\langle x^2 \rangle - \langle x \rangle^2]^{1/2}. \tag{7}$$

The quantity  $R$  is the square root of the second moment of the probability distribution of the position, and is one of the most important quantities related to the motion in general. Since  $x$  is a function of time  $t$ , so it is  $R$ . Hence, how  $R$  scales with  $t$  or with an operational time equivalent (like  $N_{\text{found}}$  or the number of moves  $N$ ) tells us how "fast" diffusion is taking place. Indeed, for the scaling relations

$$R \sim t^v \quad \text{or} \quad R \sim N^v \quad \text{or} \quad R \sim N_{\text{found}}^v, \tag{8}$$

we identify that for normal (Brownian) diffusion  $v = 1/2$ , while for superdiffusion  $v > 1/2$ , and in the ballistic limit  $v \rightarrow 1$ .

Many reaction-diffusion processes have built-in multiple time scales, for example, distinct "slow" and "fast" dynamics with different relaxation time scales. Consider the case of random searches. We expect a fast regime at scales up to the encounter of the first targets, i.e.,  $N_{\text{found}} < N_{\text{crossover}}$  or  $t < t_{\text{crossover}}$ , where the diffusive properties strictly depend on the shape of the move length pdf, and therefore can sensibly differ from Brownian normal diffusion. Actually, in this regime if the pdf  $p(\ell)$  is heavy-tailed, then the foraging process may appear as effectively superdiffusive [31]. On the other hand, there is also a long-term subsequent diffusive regime for the overall search trajectory where Brownian (normal) dynamical behavior pervades. At these large time scales, the correlations are lost and the process is essentially random and memory-free. These features might be shared among different move length pdfs, for some specific choices of their parameters. In

between these two regimes, we expect a crossover to take place from one to the other.

Finding a target either at  $x=0$  or  $x=\lambda$  is essentially a mean first-passage-time problem [28]. Let  $\langle x \rangle_{\text{fpt}}$  and  $\langle x^2 \rangle_{\text{fpt}}$  represent the average of the linear and quadratic searcher's position,  $x$  and  $x^2$ , over all walks departing from  $x_0=a$  and ending either at  $x=0$  or  $x=\lambda$  by an encounter (first passage) event. By taking into account the radius of vision  $r_v$ , the detection of targets occurs at  $x=r_v$  and  $x=\lambda-r_v$ . Recalling from Eq. (6) that  $p_0(a)$  and  $p_\lambda(a)$  are, respectively, the probabilities for a walker starting at  $x_0=a$  to find the target at  $x=0$  and  $x=\lambda$  (with  $p_0+p_\lambda=1$ ), then  $\langle x \rangle_{\text{fpt}} = r_v p_0 + (\lambda - r_v) p_\lambda$  and  $\langle x^2 \rangle_{\text{fpt}} = r_v^2 p_0 + (\lambda - r_v)^2 p_\lambda$ . Thus in analogy to Eq. (7) we find the corresponding r.m.s. of the first time passage at positions  $x=0$  or  $x=\lambda$ ,

$$R_{\text{fpt}} = [\langle x^2 \rangle_{\text{fpt}} - \langle x \rangle_{\text{fpt}}^2]^{1/2} = (\lambda - 2r_v)(p_0 p_\lambda)^{1/2}. \quad (9)$$

It should be clear that the quantities  $R$ , Eq. (7), and  $R_{\text{fpt}}$ , Eq. (9), are not the same because there is no first-passage restriction in the calculation of the standard r.m.s. distance  $R$ . Nevertheless, the dynamics of these two quantities are closely related, as we argue below. The minimum time required for the searcher with constant  $v$  to find (ballistically) the farthest target, say at  $x=\lambda$ , is  $t_{\text{ballistic}} = (\lambda - r_v - a)/v$  (note the target is detected when the searcher reaches the position  $x=\lambda - r_v$ ). In this sense, by denoting  $t_0 = \langle L_0 \rangle / v$  as the average time to find the closest target at  $x=0$ , we conclude that a searcher can go back and forth to the closest site typically a number  $t_{\text{ballistic}}/t_0$  of times during the time interval needed to reach the target at  $x=\lambda$ . At very short times, the searcher has not traveled far. So, for short times,  $t < t_{\text{crossover}}$ , the closest target will influence much more the behavior of  $R$ , since the probability to find the nearby target is much higher. As time passes, the searcher increases its probability to move away from the closest target. Then, it is the characteristic time of finding the distant target which contributes the most to the behavior of  $R$ . In such time scales,  $t_{\text{crossover}}$  should have both lower and upper limits (respectively, the minimum and the average time to find the farthest target). Consequently,

$$\frac{(\lambda - r_v - a)}{v} < t_{\text{crossover}} < \frac{\langle L_\lambda \rangle}{v}, \quad (10)$$

once we can set the minimum time to find the farthest target as  $t_{\text{ballistic}} = (\lambda - r_v - a)/v$  and the average time to find the farthest target as  $t_\lambda = \langle L_\lambda \rangle / v$  ( $t_\lambda$  marks the onset of the Brownian regime when revisits to both close and faraway targets becomes frequent). For an asymmetric initial condition ( $a \approx r_v$ ) and low targets density ( $\lambda \gg r_v$ ), we find that  $\lambda/v < t_{\text{crossover}} < \langle L_\lambda \rangle / v$ . Specifically, if the pdf allows superdiffusivity we expect the crossover to approach the lower boundary value, also characterized by the density scale of the system, i.e.,  $t_{\text{crossover}} \approx \lambda/v$ . By dividing this expression by the average time  $\langle L \rangle / v$  to reach either targets, we can also express the onset in terms of the number of targets found:

$$\frac{(\lambda - r_v - a)}{\langle L \rangle} < N_{\text{crossover}} < \frac{\langle L_\lambda \rangle}{\langle L \rangle}. \quad (11)$$

On the other hand, at long times the central limit theorem guarantees that if the move lengths have finite variance and if the correlations are of short-range (e.g., exponentially decaying), then the diffusion must converge to Brownian normal motion (upon

coarse graining or renormalization). So, for  $t > t_{\text{crossover}}$  or  $N_{\text{found}} > N_{\text{crossover}}$ ,  $R$  converges to a Brownian-type expression ( $R_{\text{Brownian}}$ ). For the asymmetric (non-destructive) case, in which the walker starts from a fixed distance  $x_0 = a = r_v + \Delta x$  to the closest target, with  $\Delta x \ll r_v \ll \lambda$ , the actual r.m.s. distance after  $N_{\text{found}} \gg 1$  "moves" (i.e.,  $N_{\text{found}} \gg 1$  targets found) has been derived in [15], i.e.  $R_{\text{Brownian}} = \lambda p_\lambda^{1/2} N_{\text{found}}^{1/2}$ . Notice the presence of the Brownian dynamics (diffusion exponent  $\nu = 1/2$ ) in the long-term regime, in agreement with the central limit theorem. Further, by writing the total distance traversed until the encounter of  $N_{\text{found}}$  targets as  $L_{\text{tot}} = vt = N_{\text{found}} \langle L \rangle$ , Eq. (3), we obtain

$$R_{\text{Brownian}} = \left( \frac{\lambda^2 v p_\lambda}{\langle L \rangle} \right)^{1/2} t^{1/2}. \quad (12)$$

### The close-to-distant ratio of target encounters

A fundamental indicator of the mechanisms of efficient searching (and surprisingly not discussed before) is the ratio  $Q$  between the average numbers of encounters of the closest and the farthest targets. Indeed, as we shall see from the numerical results below, it is the specific trade-off between visiting nearby and distant regions of targets that ultimately sets the general features (including the necessary degree of superdiffusivity) for optimal search strategies.

By definition we can write  $Q = p_0/p_\lambda = p_0/(1-p_0)$ . Nevertheless, a more interesting relation for  $Q$  can be derived as follows in terms of the degree of target revisitability. Consider first  $\langle N_N \rangle$  to be the average number of distinct targets visited in a search walk with a total of  $N_{\text{found}}$  targets found. We also denote by  $\langle N_0 \rangle$  and  $\langle N_H \rangle$  the average numbers of revisits of first (an event where a target just visited is immediately found in the next encounter) and higher (an event where a target previously visited is found again, but not in the sequence) orders, respectively. From these definitions,  $N_{\text{found}} = \langle N_0 \rangle + \langle N_H \rangle + \langle N_N \rangle$ .

Moreover, let  $\{s_i\}$  represent the set of positions of the targets found in a given random search process (i.e.,  $s_i$  is the location of the  $i$  visited target, with  $i=1,2,\dots,N_{\text{found}}$ ). In the present case, these positions must be multiples of  $\lambda$ . For instance, in the asymmetric (non-destructive) search one possible sequence could be

$$\{s_i\} = \{\lambda, 2\lambda, \lambda, \lambda, 0, -\lambda, -2\lambda, -2\lambda, -3\lambda, -2\lambda\}.$$

According to the definitions, this sequence of  $N_{\text{found}} = 10$  targets has  $N_N = 6$  ( $s_1, s_2, s_5, s_6, s_7, s_9$ ),  $N_0 = 2$  ( $s_4, s_8$ ), and  $N_H = 2$  ( $s_3, s_{10}$ ). We now forget for a while the local details of the search walk and focus only on  $\{s_i\}_{\text{eff}}$ , which is a sequence of sites visited by a Brownian random walker with total number of steps  $N_{\text{eff}}$ , step length  $\lambda$ , and equal probabilities to go either to the right or to the left. If we do not consider the events in which the walker repeats the site just visited, the above example could be represented as  $\{s_i\}_{\text{eff}} = \{\lambda, 2\lambda, \lambda, 0, -\lambda, -2\lambda, -3\lambda, -2\lambda\}$ . Therefore, we observe that this sequence has an effective total of  $N_{\text{eff}} = N_{\text{found}} - N_0 = 8$  steps. In a classical work, Montroll and Weiss calculated [32] the average number of distinct sites visited in such (i.e. our effective) 1D walk in the large- $N_{\text{eff}}$  limit as

$$\langle N_N \rangle = \left( \frac{8N_{\text{eff}}}{\pi} \right)^{1/2}, \quad (13)$$

so that in our case

$$\langle N_N \rangle = \left[ \frac{8(N_{\text{found}} - \langle N_0 \rangle)}{\pi} \right]^{1/2}. \quad (14)$$

Since  $p_0$  is the probability to return to the nearby target in a revisit of first order

$$\langle N_0 \rangle = p_0 N_{\text{found}}. \quad (15)$$

Finally, given  $\langle N_0 \rangle$ ,  $\langle N_N \rangle$  and  $N_{\text{found}}$ , we also determine

$$\langle N_H \rangle = N_{\text{found}} - \langle N_N \rangle - \langle N_0 \rangle. \quad (16)$$

From these expressions, the ratio between the average numbers of encounters of the closest (first order revisit) and farthest (new and higher order revisits) targets is

$$Q = \frac{\langle N_0 \rangle}{\langle N_N \rangle + \langle N_H \rangle}. \quad (17)$$

## Results

We have applied the general calculations of the theory (Appendix S1 in File S1) to relevant specific reorientation strategies characterized by particular pdfs  $p(\ell)$  of move lengths, namely, Lévy power-law, stretched exponential, log-normal and gamma (Appendix S2 in File S1). Our study mostly concerns the case of asymmetric initial condition (see Fig. 1), where nearby and distant targets exist [14,15]. However, results for some other initial conditions are also shown.

Each of the four distributions mentioned above can be characterized by a specific set of parameters (e.g.,  $\phi$  and  $\beta$  in the stretched exponential case). In Fig. 2 we show the variability of each pdf for a few choices of parameters. As the parameters vary, changes in the shape of the distribution (i.e. second and higher order moments, see Fig. 2) also determine changes in the search efficiency (Fig. 3). For each pdf there is a unique combination of parameters providing the optimal (highest) search efficiency  $\eta$ . By comparing the plots for the distinct pdfs, we see that the best global maximum for the asymmetric initial condition is the Lévy, followed by the log-normal, stretched exponential and gamma (note in Fig. 3 that all  $\eta$ -axes are in the same scale). Since the family of Lévy power-law pdfs is the one with fatter tails, our results indicate the relevance of long power-law tails (and the associated features, such as superdiffusivity) to achieve large search efficiencies. However, long tails by themselves cannot be regarded as the only relevant ingredient. For instance, the value  $\mu = 1.9$  that leads to the globally optimal efficiency in the asymmetric case is less heavy-tailed and less superdiffusive than the one with  $\mu \rightarrow 1$ , for which  $\eta$  is lower. Also, in the case of the stretched exponential, the higher  $\eta$  is not attained in the  $\beta \rightarrow 0$  limit, equivalent to the Lévy ballistic  $\mu \rightarrow 1$ , but with the intermediate value  $\beta = 0.26$ .

As we argue below, it is the specific trade-off between visiting nearby and distant regions (while looking for targets) that ultimately sets the most appropriate choice of parameters and, consequently, the shape of the optimal pdf (and the related diffusivity) yielding the best search strategy.

The subtle balance between accessing nearby and distant regions of the search space can be inferred if we factorize the search efficiency into its major components, Eq. (6). First, we observe in Fig. 4 that the qualitative shape of the  $\langle L \rangle$  ( $=\eta^{-1}$ ) curve is essentially determined by the term responsible for the distant target encounters ( $p_\lambda \langle L_\lambda \rangle$ ). This is so because, as we move from ballistic to Brownian motion strategies (see caption of Fig. 3), the mean traveled distance to the distant target ( $\langle L_\lambda \rangle$ ) increases whereas the probability to find it ( $p_\lambda$ ) decreases, so that  $\langle L \rangle$  is minimized (i.e., the efficiency is maximized) approximately when the product  $p_\lambda \langle L_\lambda \rangle$  is minimized. In contrast, as both  $\langle L_0 \rangle$  and  $p_0$  increase going from ballistic to Brownian strategies, the product  $p_0 \langle L_0 \rangle$  (responsible for the nearby target encounters) also increases (no counterbalance of opposite factors exists). This latter feature implies a very interesting, but counter-intuitive result: large move lengths and/or an adequate superdiffusive component (heaviness of the pdf) helps to improve the search efficiency in the asymmetric (non-destructive) search condition, where a nearby target is always present. Indeed, as both Figs. 3 and 4 show, a Brownian search strategy actually leads to rather inefficient searches in this case.

Even though the search optimization curve (the shape of  $\eta$ ) is strongly influenced by  $p_\lambda \langle L_\lambda \rangle$ , certainly  $p_0 \langle L_0 \rangle$  also plays an important role, as seen in the  $\langle L \rangle$  curves in Fig. 4. In fact, we note that the factorized quantity  $p_0 \langle L_0 \rangle$  ( $p_\lambda \langle L_\lambda \rangle$ ) limits the efficiency of the strategies in the Brownian (ballistic) regime. In intermediate regimes, search strategies allow the sum of these two quantities to be minimal, and this is when the maximum efficiency can be achieved. Interestingly, as observed in Fig. 4, the global maximum  $\eta$  for the Lévy pdf with  $\mu = 1.9$  occurs after the crossover between the  $p_\lambda \langle L_\lambda \rangle$  and  $p_0 \langle L_0 \rangle$  curves, in the region where the largest contribution to  $\langle L \rangle$  comes from the nearby visits,  $p_0 \langle L_0 \rangle$ .

In Fig. 5 we show the r.m.s. behavior of the random search process in the asymmetric search condition. A crossover point between two different diffusive regimes can be observed for certain move length pdf parameterizations. Move length pdfs with heavy-enough tails promote superdiffusion over the range of spatiotemporal scales where encounters are negligible (i.e. first-passage time regime). As spatiotemporal scales become larger (long-term regime) move length truncations due to encounters pervade the search process which then becomes Brownian (normal diffusion). Because of this, the crossover takes place around the characteristic density scale of the system,  $\lambda$  (we use  $\lambda = 10^3$  in Fig. 5). However, it can occur even before (or simply disappear) if the move length pdf is such that it barely holds, or it cannot hold, superdiffusive properties over some scales range.

Overall, in Fig. 5 a nice agreement is displayed between numerical simulations and the short-term  $R_{\text{fpt}}$  and the long-term  $R_{\text{Brownian}}$  regime predictions. We can also check the theoretical estimation of the  $R_{\text{fpt}} - R_{\text{Brownian}}$  crossover. Based on the theory presented in [see Eq. (10)], for the truncated Lévy pdf with  $\mu = 1.9$ ,  $\tau = 10^4$ ,  $\lambda = 10^3$ ,  $r_v = 1$ ,  $v = 1$ , and  $a = 1.2$  (asymmetric case), we find that the crossover time should approach the lower boundary,  $t_{\text{crossover}} \approx (\lambda - r_v - a)/v = 997.8$ . This prediction compares nicely with the numerical results of Fig. 5, where  $t_{\text{crossover}} \approx 1000$ .

When we compare in Fig. 6a the r.m.s behavior of the optimal strategy of diverse pdfs  $p(\ell)$  in the asymmetric condition ( $x_0 = 2r_v = 2$ ), we observe a pretty similar scaling exponent in the first-passage time regime ( $v = 0.85$ ), which is close to the theoretical

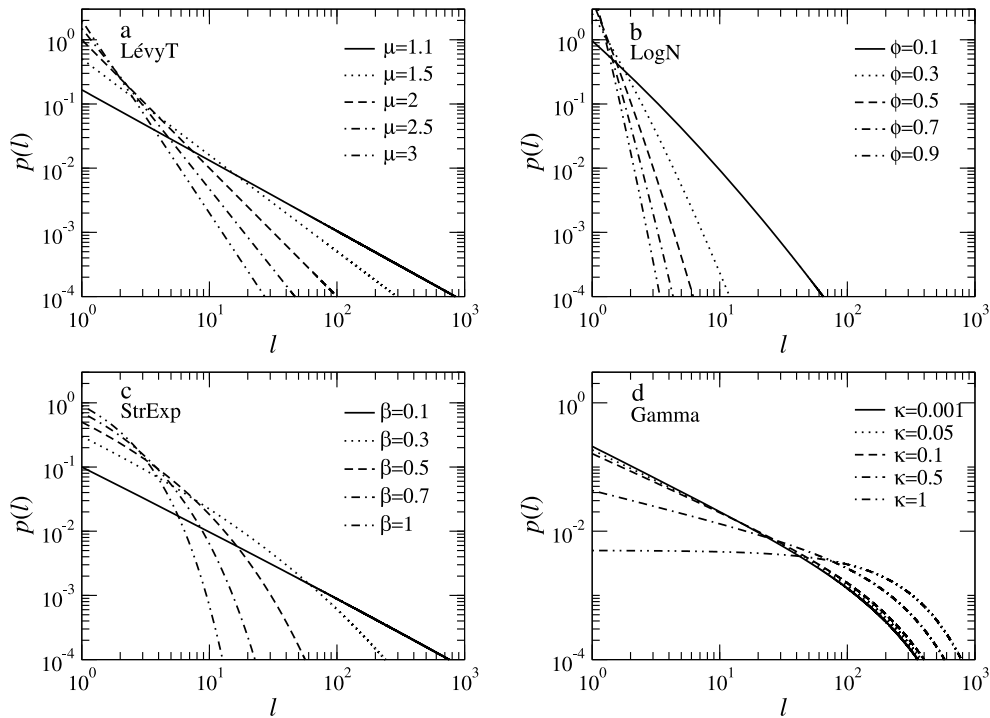

**Figure 2. Probability density functions.** Different combinations of shape parameters (scale parameters are fixed) for the four different move length probability density functions here considered as reorientation strategies: (a) Lévy truncated ( $\tau = 10^4$ ), (b) log-normal ( $\beta = 50$ ), (c) stretched exponential ( $\phi = 1$ ), and (d) gamma ( $\beta = 0.005$ ). For all the distributions (except for the gamma), the smaller the shape parameter the heavier the tail, hence the larger the probability of large move lengths. doi:10.1371/journal.pone.0106373.g002

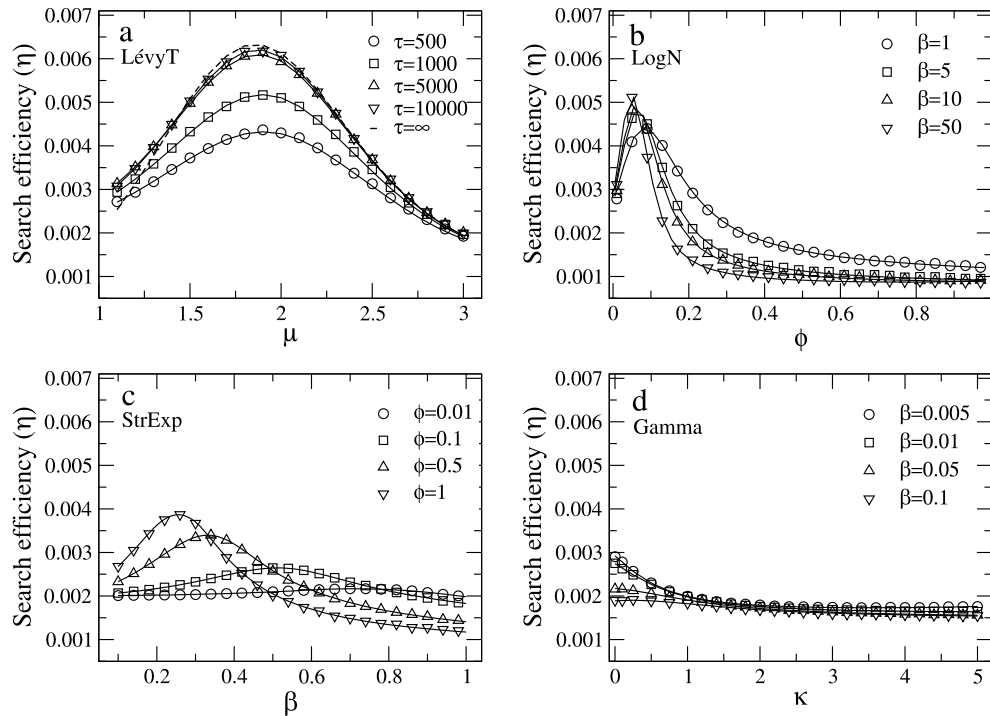

**Figure 3. Search efficiency.** Search efficiency  $\eta$  for (a) Lévy truncated, (b) log-normal, (c) stretched exponential, and (d) gamma reorientation strategies in the asymmetric search condition. Different combinations of parameters are shown for each strategy. On the  $x$ -axes, low (large) parameter values represent ballistic (Brownian) regimes, to be compared with the heavy (non-heavy) pdf tails in Fig. 2. Maximum search efficiencies are achieved at some intermediate value of the parameters ( $x$ -axes), except for the gamma distribution where the maximum takes place at  $k \rightarrow 0$ . Notice the striking agreement between the analytical (black lines) and the numerical (symbols) results. We used parameters  $\Delta x = 0.2$ ,  $r_v = \ell_0 = 1$ ,  $\lambda = 10^3$ , and  $x_0 = 2r_v$ . doi:10.1371/journal.pone.0106373.g003

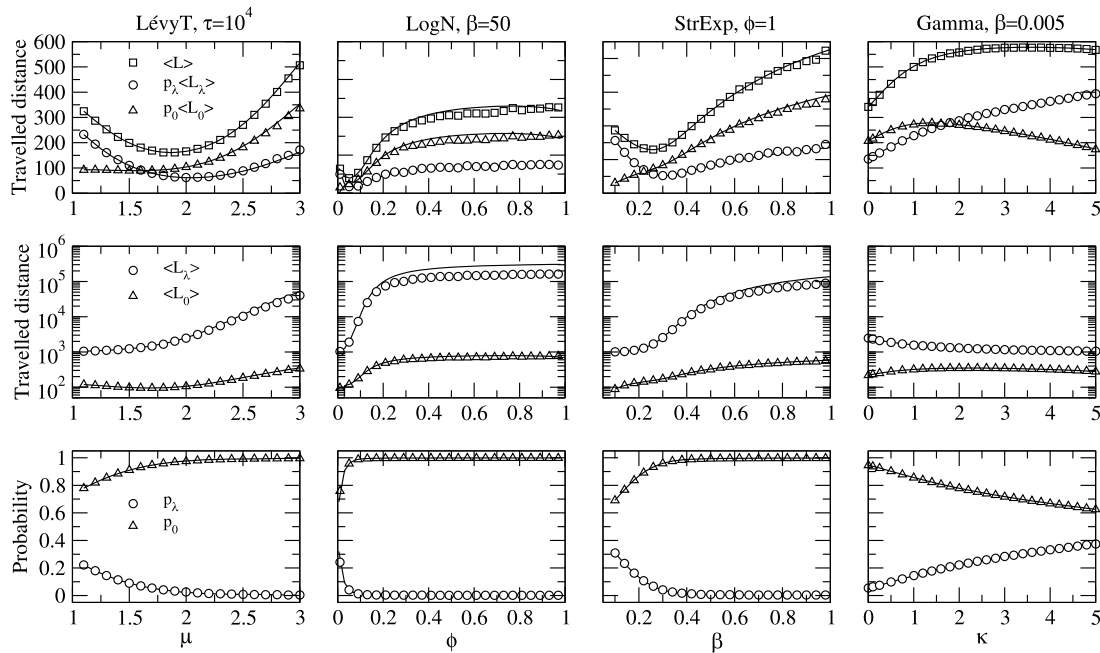

**Figure 4. Factorized search efficiency.** Factorized search efficiency,  $\langle L \rangle = p_0 \langle L_0 \rangle + p_\lambda \langle L_\lambda \rangle$ , analyzed to understand the relative contribution of the encounters of near (subscript 0) and distant (subscript  $\lambda$ ) targets to the global search efficiency in the asymmetric search scenario. The behavior of the traveled distances ( $\langle L \rangle$ ,  $p_0 \langle L_0 \rangle$ , and  $p_\lambda \langle L_\lambda \rangle$ ) and the partial quantities ( $\langle L_0 \rangle$ ,  $\langle L_\lambda \rangle$ ,  $p_0$ ,  $p_\lambda$ ) is shown for each pdf model. Except for the gamma model, the search dynamics goes from ballistic to Brownian with increasing shape parameters (compare across  $x$ -axes with Fig. 2). The scale parameters are fixed at the search optimal. Note that the minimal  $\langle L \rangle$  is close to the minimal  $p_\lambda \langle L_\lambda \rangle$ , suggesting that, in the asymmetric search condition, the encounter efficiency of distant targets is relevant to the global search efficiency. However, the precise optimal strategy in each case results from the subtle balance between exploring nearby areas and accessing faraway regions. Analytical (black lines) and numerical (symbols) results are displayed with nice agreement. We used parameters  $\Delta x = 0.2$ ,  $r_v = \ell_0 = 1$ ,  $\lambda = 10^3$ , and  $x_0 = 2r_v$ . doi:10.1371/journal.pone.0106373.g004

diffusion exponent for a non-truncated Lévy strategy in free space [15,33]. These results suggest that nearly the same unique optimal diffusion *exponent* should exist for the best parametrization choice of different models (Fig. 6b). This optimal exponent clearly depends on the specific initial condition (i.e.  $x_0$ ). Different models, with different parametrization, should approach the optimal scaling exponent to some extent in order to generate an efficient reorientation strategy.

In contrast, the optimal diffusion *constant* largely varies depending on the reorientation strategy. Figure 6b explicitly compares, across models, the diffusive parameters and the close-to-distant ratio of target encounters  $Q$ , Eq. (17). As mentioned above, the diffusion exponents for the four models reach values close to  $\nu = 0.85$ . On the contrary, the diffusion constants and the  $Q$  values show a large range of variation. In general, the smaller the optimal diffusion constant, the larger the  $Q$  value and the efficiency of the search strategy (compare Figs. 3 and Fig. 6b). This pattern suggests that small diffusion constants (i.e., Lévy and log-normal models) increase the relative contribution to the search efficiency of close target encounters compared to distant ones, implying larger values of  $Q$ . Hence, once an optimal diffusion exponent has been achieved, a small diffusion constant should further improve the search efficiency in the asymmetric condition by providing an optimal balance between visiting nearby and faraway targets through the enhancement of the average encounter rate of close targets. In this case, models incorporating Lévy statistics are the most efficient ones (Fig. 3), precisely because they can generate optimal superdiffusive patterns while keeping the diffusion constant at a minimum rate, which facilitates intensive (localized) search.

We finally comment on the effect of the initial search condition ( $x_0$ ) on the optimality of random searches. The starting position  $x_0$  sets the initial distance to the closest and farthest targets, determining the degree of asymmetry in the relative distances of targets, bearing connections with landscape degrees of heterogeneity [14]. The highest asymmetric case ( $x_0 = \ell_0 + r_v = 2r_v$ ) is the main focus of this work, but a continuous range of asymmetry can be found as  $x_0$  varies from  $x_0 = 2r_v$  to the most symmetrical case  $x_0 = \lambda/2$ . In Fig. 6c,d we show the search efficiency and the  $Q$  ratios for each optimal model at each initial condition  $x_0$  in this range. Across  $x_0$ , Lévy reorientation strategies are always the most efficient, but its relative gain in efficiency compared to the other pdfs becomes progressively smaller as  $x_0 \rightarrow \lambda/2$  (we use  $\lambda = 10^3$ ). In particular, the pure (i.e., non-truncated) Lévy strategy provides the maximum possible search efficiency at  $x_0 = \lambda/2$ , i.e.  $\eta = 1/\langle L \rangle = 2/\lambda$ , in which the faraway targets are reached in only one very large (ballistic) move of length  $\lambda/2$ . However, the same is not always true for truncated Lévy search walks with a maximum cutoff length  $\tau$ . In this case, other strategies can display higher efficiencies close to the symmetric regime, given that this upper truncation may considerably decrease the ability to reach distant targets (in Fig. 6 we use  $\tau = 10\lambda$ ). Regarding the  $Q$ -ratios we observe that in the asymmetric regime optimal search strategies are associated to large values ( $Q \gg 1$ ). As we move from asymmetric to symmetric initial regimes, the  $Q$ -ratios tend to become smaller as the probability to encounter the closest target (assigned at  $x = 0$ ) decreases. This trend remains until reaching the limiting value  $Q = 1$  in the fully symmetric condition, where it is equiprobable for the searcher to find the targets at  $x = 0$  or  $x = \lambda$ .

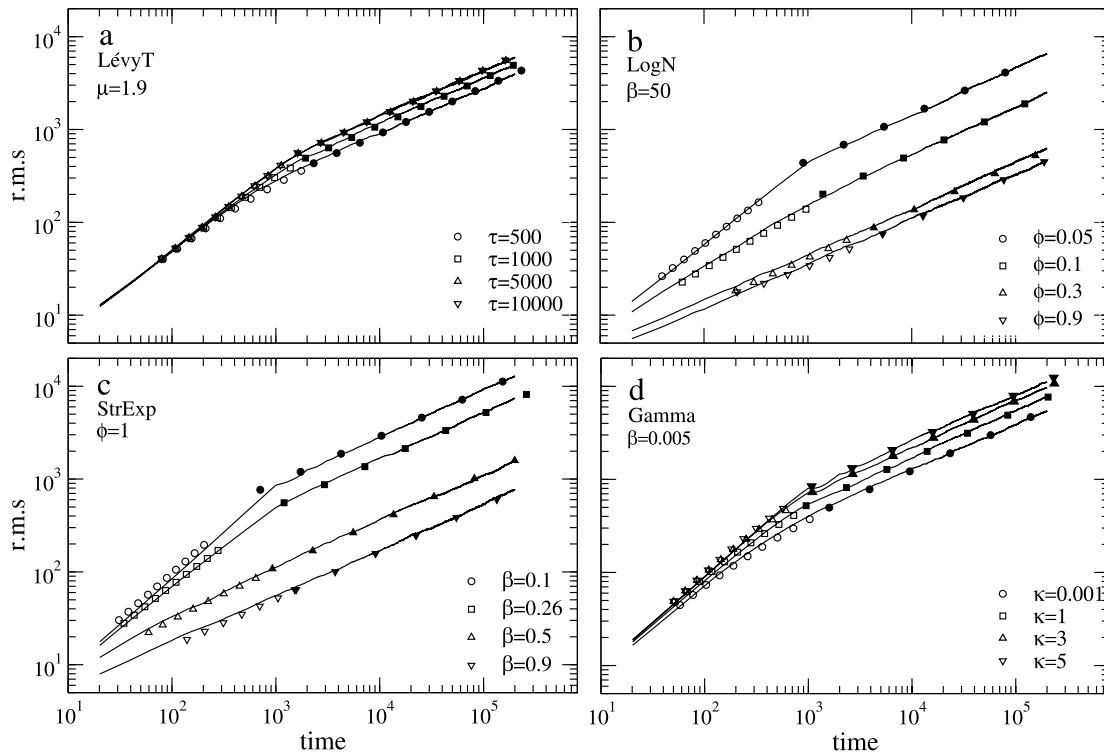

**Figure 5. Root mean square behavior.** R.m.s. behavior for the different reorientation strategies (different parametrization for each case) in the asymmetric search condition. In each case the fixed parameter is set at the search optimal. Note the switch in the spreading dynamics of the searcher at times  $\approx 10^3$  (for some of the parametrization), coinciding with the parameter  $\lambda$ . Solid lines: numerical simulations. Symbols: analytical results for both the short-term first-passage-time regime,  $R_{\text{fpt}}$ , defined in Eq. (9) (open symbols), and the long-term Brownian regime, defined in Eq. (12) (filled symbols). Notice the nice agreement between numerical and analytical results. We used parameters  $\Delta x = 0.2$ ,  $r_v = \ell_0 = 1$ ,  $\lambda = 10^3$ , and  $x_0 = 2r_v$ . doi:10.1371/journal.pone.0106373.g005

## Discussion

A key tension identified in random (stochastic, non-oriented) search strategies is to find the balance between efficiently looking for nearby targets while exploring new areas to find distant targets [14,15,27]. When this trade-off is important, the exact stochastic laws governing reorientation strategies (i.e., move length or interevent reorientation time pdfs) have a clear impact on the search success. The SOFT framework discussed here shows the fundamental principles underlying efficient stochastic searching under the assumption that movement is not governed by cues (but see [18]), and that both close and distant targets are available (asymmetric condition or non-destructive search in [20]). Being simple enough to allow a general and complete study, the 1D case is thus very useful in establishing a coherent rationale to analyze crucial mechanisms of random search processes. Moreover, as discussed in the Introduction, many relevant features of  $n$ D random search are akin to the 1D case [14,20].

We have found that the ballistic strategy is very efficient in locating distant targets. However, once the direction towards the distant target has been chosen, the ballistic strategy prevents finding closer targets, and in this sense the overall search efficiency ends up governed or limited by the distant target encounters. On the other hand, the Brownian strategy is assumed to be the most efficient one to locate nearby targets, but entails too much spatial overlap. We explicitly show that the introduction of some rare albeit large move lengths enhance nearby target encounter rates by reducing the spatial overlap and the occurrence of *excessively large and small-stepped walks*. Nearby encounters based on the latter type of walks ultimately limit the search efficiency of

Brownian strategies. In the end, neither ballistic nor Brownian strategies alone solve the encounter problem when close and distant targets need to be found.

Based on our comparison across reorientation strategies in the asymmetric initial condition, we found that the essential mechanism leading to an efficient random search consists on both *the combination of an optimal superdiffusive exponent with a minimal diffusion constant*. The search process not only should adequately balance the tension between finding close and distant targets, but it should also be capable of maximizing the chances to fill in nearby spatial voids generated through the search process. In other words, the best strategies are those that not only can promote superdiffusive properties but can also shift the optimal balance towards relatively larger close-target compared to distant-target encounters.

The move length distributions analyzed here have finite moments, and thus all of them fulfill the central limit theorem, generating pure diffusive properties at some scale (generally large). Because of this, it might be preferable the term *enhanced diffusion* or *transient superdiffusion* rather than superdiffusion [14]. Importantly, we show that the distributions with slower convergence rates to the central limit theorem (the ones with fattest tails) have the larger search efficiency. In the long run, all the strategies might show Brownian properties but their search efficiencies are going to be different due to transient superdiffusive properties that can hold over relevant spatiotemporal scales in relation to the search process. In the end, the amount of superdiffusion needed to optimize the search depends also on the specific initial conditions (i.e. landscape properties).



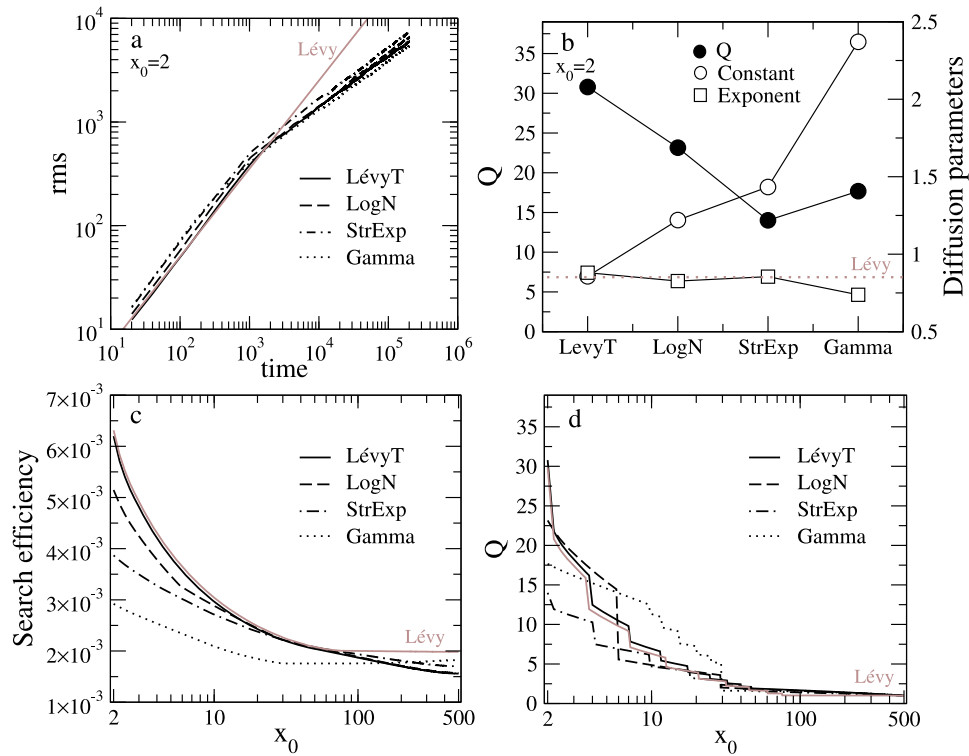

**Figure 6. Role of diffusion and the close-to-distant encounter ratio in search efficiency.** Comparison of key quantities across *optimal* reorientation strategies at  $x_0=2$  (a,b), and for any initial condition  $x_0$  (c,d). Panels a and b: r.m.s. behavior (a) and values for the diffusion constant, diffusion exponent, and close-to-distant encounter ratio  $Q$  (b) at the asymmetric search condition ( $x_0=2r_v$ ,  $\lambda=10^3$ , and  $r_v=\ell_0=1$ ). Parameter values as follows: Lévy truncated ( $\mu=1.9$ ,  $\tau=10^4$ ), log-normal ( $\phi=0.05$ ,  $\beta=50$ ), stretched exponential ( $\phi=1$ ,  $\beta=0.26$ ) and gamma ( $\beta=0.005$ ,  $\kappa=0.001$ ). Solid brown lines show the r.m.s. behavior (a) and the diffusion exponent (b) for a non-truncated Lévy reorientation strategy with Lévy index  $\mu=2$ . Panels c and d: search efficiency (c) and  $Q$ -ratio (d) for the *optimal* reorientation strategies at different initial conditions  $x_0$  in the whole range up to  $\lambda/2$ . Solid brown lines indicate the results for a pure Lévy walk with  $\mu_{opt}(x_0)$ . Note that, regardless  $x_0$ , Lévy reorientation strategies show the largest search efficiency compared to the other reorientation strategies, though truncation decreases the efficiency when reaching the symmetric limit  $x_0=\lambda/2=500$ .  
doi:10.1371/journal.pone.0106373.g006

The mechanistic rationale exposed above should be valid for any dimensional system. However, we should observe that the relative impact on the search efficiency of Lévy patterns against other strategies decreases when dimensionality increases [17,27,34,35]. More generally, mean field theory predicts that in the limit of large number of dimensions, encounter rates would depend more on the target/searcher relative densities rather than on the search dynamics (type of movement and encounter reactions), initial search position, or target distribution.

Foraging animals are known to switch between intensive and extensive modes of search, producing complex movement patterns [16,36]. The spatiotemporal structure of such *run and tumble* patterns can be adjusted to optimize the compromise of finding both close and distant targets. These elementary results are in general concordance with simulation results exploring the effect of different encounter reactions and system dimensions on optimal search strategies [17,35,37–40]. They are also valid for intermittent search strategies where mixtures of short and fast trips exist but scanning is discontinuous [41–44].

The present work departs from current movement modeling debates by depicting relevant generic properties of the search process, going beyond specific model parametrization (Figure 6). Animals’ search behavior may not consist on following specific random walk types, but on accommodating (to the extent they can) key statistical movement properties, ideally reflected in the Lévy model. Commonly used statistical approaches do not always allow

distinguishing unambiguously between qualitatively different processes [45] as, for instance, composite random walks from Lévy walks [36,46–50]. Because biological motor-sensory systems are constrained by evolutionary history [51–53] we should not expect Nature to strictly follow mathematical models. Our results suggest that regardless of the specific behavioral processes involved, the incorporation of multiple movement scales in the search (for example by means of complex directional change distributions) should improve the way animals resolve the intensive-extensive search trade-off.

SOFT and current works on random search [20,41,42,44,54,55] show how basic tools of statistical mechanics [13,56–58] can naturally address the concepts of search and uncertainty in behavioral ecology. Routes to integrate classical OFT [2,4,6,59–61], sensory ecology [18,62], and SOFT will be needed in order to satisfactorily answer questions about efficiency and adaptiveness to uncertainty in animal foraging strategies [11,13].

**Supporting Information**

**File S1 Developements in random search theory: mathematical expressions and numerical procedures.** Appendix S1 Explicit expressions and numerical procedures to calculate relevant random search quantities in the general case of  $p(\ell)$ .

Appendix S2 Application of the general theory to specific reorientation strategies,  $p(\ell)$ 's. (PDF)

## Acknowledgments

All authors thank the hospitality and the fruitful discussions that took place at the Simon Levin Lab, at the Department of Ecology and Evolutionary Biology, Princeton University (USA). The authors also acknowledge the

hospitality of CEAB-CSIC community, and Jordi Catalan for his generous and profuse insights on the problem of search.

## Author Contributions

Conceived and designed the experiments: FB EPR GV MGEeL. Contributed reagents/materials/analysis tools: FB EPR GV MGEeL. Wrote the paper: FB EPR GV MGEeL. Performed the analytical and numerical analysis: FB EPR.

## References

- Kamil AC, Sargent TD, editors (1981) Foraging Behavior: Ecological, Ethological, and Psychological Approaches. Garland Series in Ethology, Garland STPM Press, New York.
- Kamil AC, Krebs JR, Pulliam HR, editors (1987) Foraging Behavior. Plenum Press, New York.
- Shoener TW (1987) A brief history of optimal foraging ecology. In: Kamil AC, Krebs JR, Pulliam H, editors, Foraging Behavior, Plenum Press, New York. pp.5–67.
- Krebs JR, Davies NB (1993) An Introduction to Behavioural Ecology. Blackwell, Oxford (3rd ed).
- Stephens DW (2007) Models of information use. In: Stephens DW, Brown JS, Ydenberg RC, editors, Foraging: Behaviour and Ecology, The University of Chicago Press. Chicago, USA. pp.31–58.
- Shoener TW (1971) Theory of feeding strategies. *Ann Rev Ecol Syst* 2: 369–404.
- Lima SL, Zollner PA (1996) Towards a behavioural ecology of ecological landscapes. *Trends Ecol Evol* 11: 131–135.
- Zollner PA, Lima SL (1997) Landscape-level perceptual abilities in white-footed mice: perceptual range and detection of forested habitats. *Anim Behav* 80: 51–60.
- Zollner PA, Lima SL (1999) Illumination and the perception of remote habitat patches by white-footed mice. *Anim Behav* 58: 489–500.
- Hoffmann G (1983) The random elements in the systematic search behavior of the desert isopod *Hemilepistus reaumuri*. *Behav Ecol Sociobiol* 13: 81–92.
- Bartumeus F (2009) Behavioural intermittence, Lévy patterns, and randomness in animal movement. *Oikos* 118: 488–494.
- da Luz MGE, Grosberg A, Raposo EP, Viswanathan GM (2009) The random search problem: Trends and perspectives. *J Phys A* 42: 430301.
- Viswanathan GM, da Luz MGE, Raposo EP, Stanley HE (2011) The Physics of Foraging: An Introduction to Random Searches and Biological Encounters. Cambridge University Press, New York.
- Raposo EP, Bartumeus F, da Luz MGE, Ribeiro-Neto PJ, Souza TA, et al. (2011) How landscape heterogeneity frames optimal diffusivity in searching processes. *PLoS Comput Biol* 7: e1002233.
- Bartumeus F, Raposo EP, Viswanathan GM, da Luz MGE (2013) Stochastic optimal foraging theory. In: Lewis MA, Maini PK, Petrovskii SV, editors, Dispersal, Individual Movement and Spatial Ecology: A Mathematical Perspective, Springer-Verlag Berlin Heidelberg. pp.3–32.
- Bell WJ (1991) Searching behaviour: the behavioural ecology of finding resources. Chapman and Hall Animal Behaviour Series. Chapman and Hall. London, UK.
- James A, Planck MJ, Edwards AM (2011) Assessing Lévy walks as models of animal foraging. *J R Soc Interface* 8: 1233–1247.
- Hein AM, McKinley SA (2012) Sensing and decision-making in random search. *P Natl Acad Sci USA* 109: 12070–12074.
- Berg HC (1993) Random Walks in Biology. Princeton University Press. New Jersey, USA.
- Viswanathan GM, Buldyrev S, Havlin S, da Luz MGE, Raposo EP, et al. (1999) Optimizing the success of random searches. *Nature* 401: 911–914.
- Anderson DJ (1982) Optimal foraging and the traveling salesman. *Theor Popul Biol* 24: 145–159.
- Reynolds AM, Frye MA (2007) Free-flight odor tracking in *Drosophila* is consistent with an optimal intermittent scale-free search. *PLoS ONE* 4: e345.
- Dees ND, Bahar S, Moss F (2008) Stochastic resonance and the evolution of *Daphnia* foraging strategy. *Phys Biol* 5: 044001.
- Dees ND, Bahar S, Garcia R, Moss F (2008) Patch exploitation in two dimensions: from *Daphnia* to simulated foragers. *J Theor Biol* 252: 69–76.
- Liang L, Nørrelykke SF, Cox EC (2008) Persistent cell motion in the absence of external signals: a search strategy for eukaryotic cells. *PLoS ONE* 3: e2093.
- Méndez V, Campos D, Bartumeus F (2014) Stochastic Foundations in Movement Ecology. Springer Series in Synergetics. Springer Berlin Heidelberg, 177–205 pp.
- Bartumeus F, Levin SA (2008) Fractal intermittence in locomotion: linking animal behaviour to statistical patterns of search. *P Natl Acad Sci USA* 150: 19072–19077.
- Redner S (2001) A Guide to First-Passage Processes. Cambridge University Press. Cambridge, UK.
- Buldyrev SV, Havlin S, Kazakov AY, da Luz MGE, Raposo EP, et al. (2001) Average time spent by Lévy flights and walks on an interval with absorbing boundaries. *Phys Rev E* 64: 041108.
- Buldyrev SV, Gitterman M, Havlin S, Kazakov AY, da Luz MGE, et al. (2001) Properties of Lévy flights on an interval with absorbing boundaries. *Physica A* 302: 148–161.
- Viswanathan GM, Raposo EP, Bartumeus F, Catalan J, da Luz MGE (2005) Necessary criterion for distinguishing true superdiffusion from correlated random walk processes. *Phys Rev E* 72: 011111(6).
- Montroll EW, Weiss GH (1965) Random walks on lattices. ii. *J Math Phys* 6: 167–181.
- Shlesinger MF, Klafter J (1985) Comment on accelerated diffusion in Josephson junctions and related chaotic systems. *Phys Rev Lett* 54: 2551–2551.
- Bartumeus F, Fernández P, da Luz MGE, Catalan J, Solé RV, et al. (2008) Superdiffusion and encounter rates in diluted, low dimensional worlds. *Eur Phys J Spec Topics* 157: 157–166.
- Reynolds AM, Bartumeus F (2009) Optimising the success of random destructive searches: Lévy walks can outperform ballistic motions. *J Theor Biol* 260: 98–103.
- Benhamou S (2007) How many animals really do the Lévy walk? *Ecology* 88: 1962–1969.
- Raposo EP, Buldyrev SV, da Luz MGE, Santos MC, Stanley HE, et al. (2003) Dynamical robustness of Lévy search strategies. *Phys Rev Lett* 91: 240601.
- Santos MC, Raposo EP, Viswanathan GM, da Luz MGE (2004) Optimal random searches of revisitable targets: crossover from superdiffusive to ballistic random walks. *Europhys Lett* 67: 734–740.
- Planck MJ, James A (2008) Optimal foraging: Lévy pattern or process? *J R Soc Interface* 5: 1077–1086.
- James A, Planck MJ, Brown R (2008) Optimizing the encounter rate in biological interactions: ballistic versus Lévy versus brownian strategies. *Phys Rev E* 78: 051128.
- Bénichou O, Loverdo C, Moreau M, Voituriez R (2006) Two-dimensional intermittent search processes: an alternative to Lévy flight strategies. *Phys Rev E* 75: 020102(R).
- Lomholt MA, Koren T, Metzler R, Klafter J (2008) Lévy strategies in intermittent search processes are advantageous. *P Natl Acad Sci USA* 105: 1055–1059.
- Bénichou O, Loverdo C, Moreau M, Voituriez R (2011) Intermittent search strategies. *Rev Mod Phys* 83: 81–129.
- Campos D, Méndez V, Bartumeus F (2012) Optimal intermittence in search strategies under speed-selective target detection. *Phys Rev Lett* 108: 028102.
- Kawai R, Petrovskii S (2012) Multi-scale properties of random walk models of animal movement: lessons from statistical inference. *P Roy Soc A* 468: 1428–1451.
- Reynolds AM (2008) How many animals really do the Lévy walk? comment. *Ecology* 89: 2347–2351.
- Reynolds AM (2010) Bridging the gulf between correlated random walks and Lévy walks: autocorrelation as a source of Lévy walk movement patterns. *J R Soc Interface* 7: 1753–1758.
- de Jager M, Weissing FJ, Herman PJ, Nolet BA, van de Koppel J (2011) Lévy walks evolve through interaction between movement and environmental complexity. *Science* 332: 1551–1553.
- Jansen VAA, Mashanova A, Petrovskii S (2012) Comment on Lévy walks evolve through interaction between movement and environmental complexity. *Science* 335: 918.
- de Jager M, Weissing FJ, Herman PMJ, Nolet BA, van de Koppel J (2012) Response to comment on Lévy walks evolve through interaction between movement and environmental complexity. *Science* 335: 918.
- Jacob F (1977) Evolution and tinkering. *Science* 196: 1161–1166.
- Kauffman SA, Levin SA (1987) Towards a general theory of adaptive walks on rugged landscapes. *J Theor Biol* 128: 11–45.
- Levin SA (1998) Ecosystems and the biosphere as complex adaptive systems. *Ecosystems* 1: 431–436.
- Bartumeus F, da Luz MGE, Viswanathan GM, Catalan J (2005) Animal search strategies: a quantitative random-walk analysis. *Ecology* 86: 3078–3087.
- Reynolds AM, Smith AD, Menzel R, Greggers U, Reynolds DR, et al. (2007) Displaced honey bees perform optimal scale-free search flights. *Ecology* 88: 1955–1961.
- Okubo A, Levin SA (2001) Diffusion and Ecological Problems: Modern Perspectives. Springer Berlin Heidelberg.
- Shlesinger MF, Klafter J (1985) Lévy walks versus Lévy flights. In: Stanley H, Ostrowsky N, editors, On Growth and Form: Fractal and Non-Fractal Patterns in Physics. Nijhoff, Dordrecht. pp.279–283.

58. Shlesinger MF, Zaslavsky G, Frisch U, editors (1995) Lévy Flights and Related Topics in Physics. Springer, Berlin.
59. Green RF (1987) Stochastic models of optimal foraging. In: Kamil A, Krebs J, Pulliam H, editors, Foraging Behaviour, Plenum Press, New York. pp.273–302.
60. Kacelnick A, Todd IA (1992) Psychological mechanisms and the marginal value theorem: Effect of variability in travel time on patch exploitation. Anim Behav 43: 313–322.
61. Cuthill IC, Haccou P, Kacelnick A (1994) Starlings *sturnus vulgaris* exploiting patches: Response to long-term changes in travel time. Behav Ecol 5: 81–90.
62. Dusenbery DB (1992) Sensory Ecology: How Organisms Acquire and Respond to Information. W.H. Freeman and Company, New York.
